# Supplementary material for: An Extensive Circuitry for Cell Wall Regulation in Candida albicans
Source: PubMed Central journal article supplement (PMC2816693; doi:10.1371/journal.ppat.1000752), 2010-02-05

Figure S3

DIC/*SEP7*-GFP merge

*SEP7*-GFP

*bck1*<sup>-/-</sup>

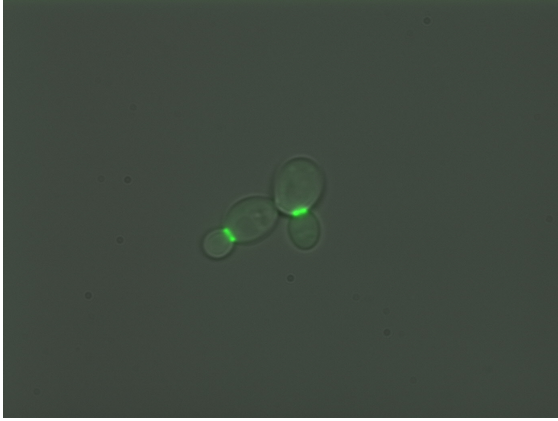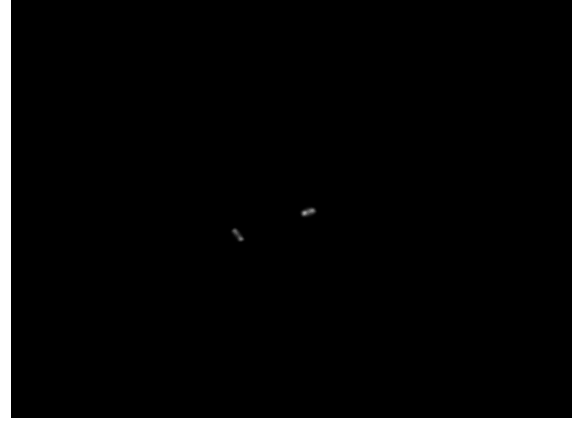

*cbk1*<sup>-/-</sup>

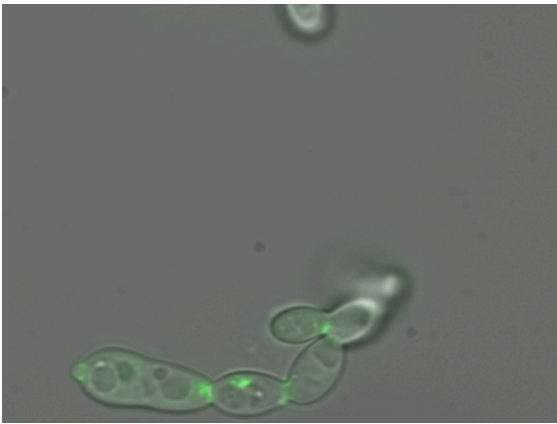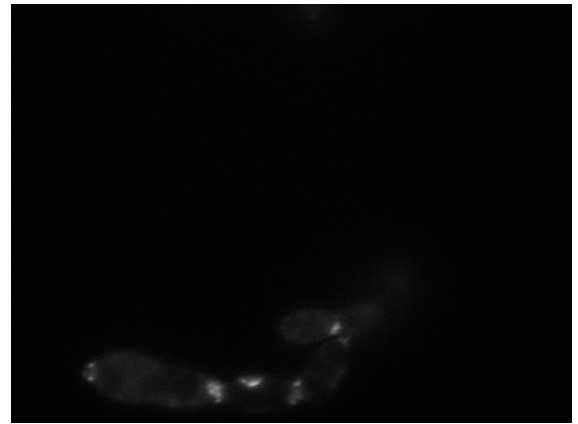

*ckb1*<sup>-/-</sup>

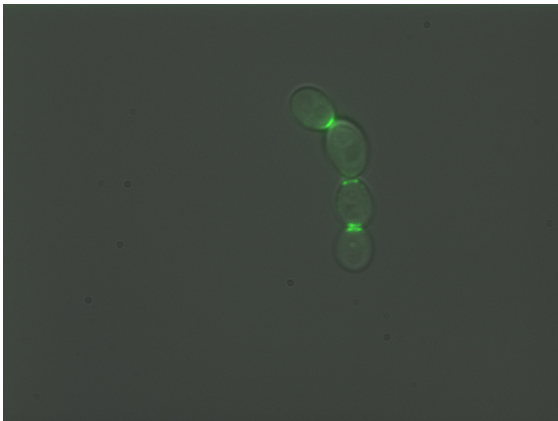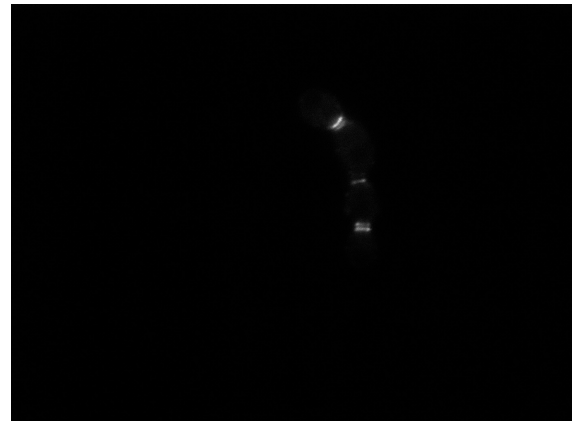

*ckb2*<sup>-/-</sup>

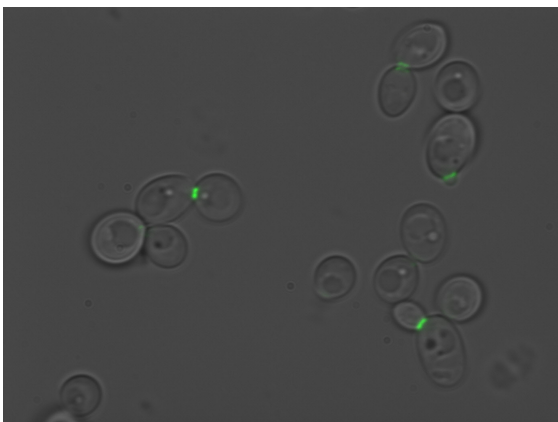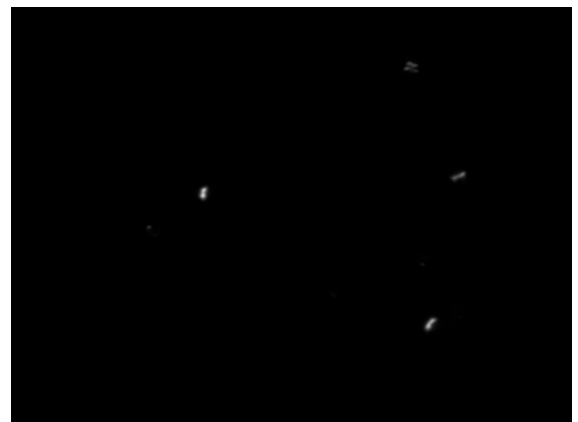

DIC/SEP7-GFP merge

SEP7-GFP

*cla4*<sup>-/-</sup>

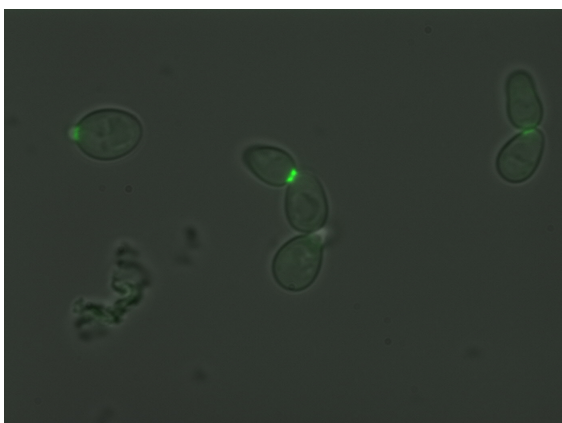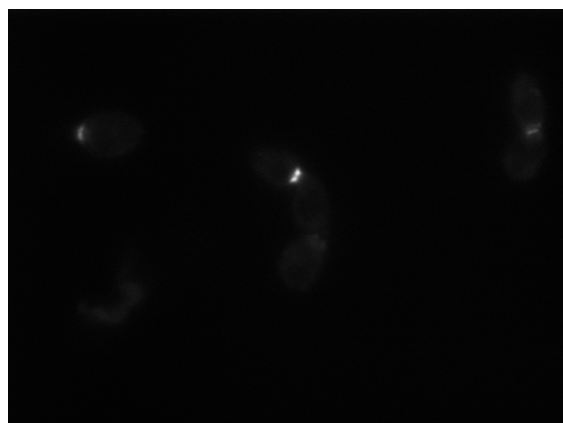

*gin4*<sup>-/-</sup>

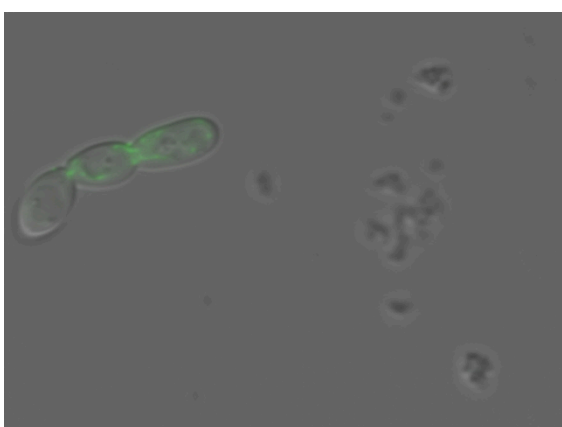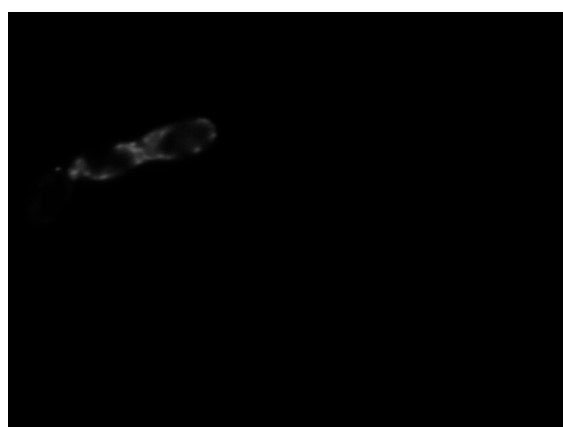

*hsl1*<sup>-/-</sup>

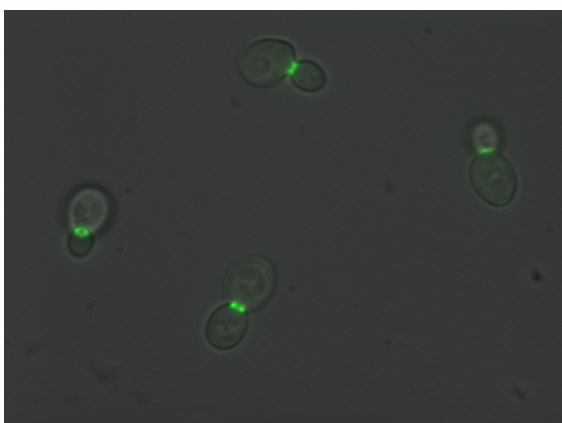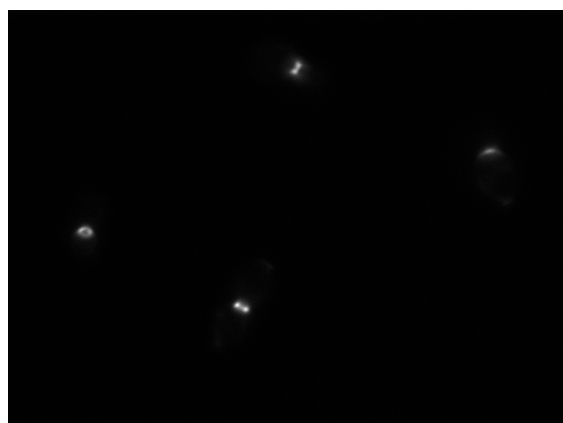

*ire1*<sup>-/-</sup>

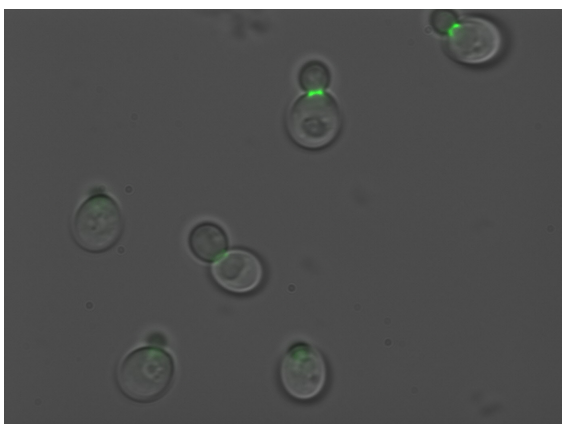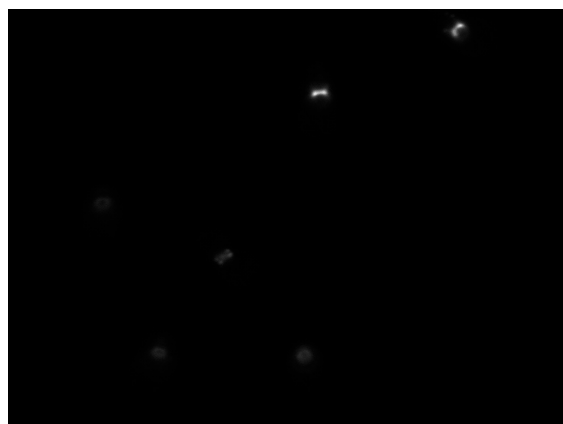

DIC/SEP7-GFP merge

SEP7-GFP

*kin3-/-*

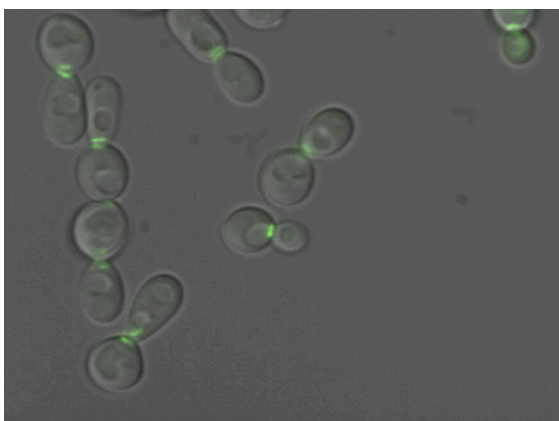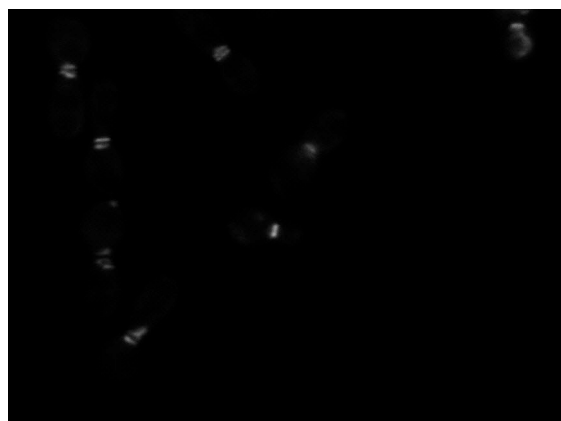

*kis1-/-*

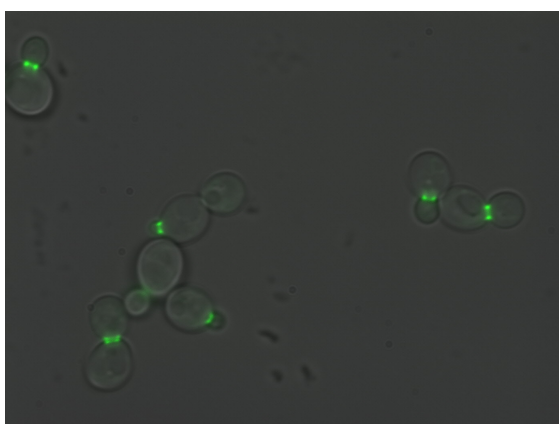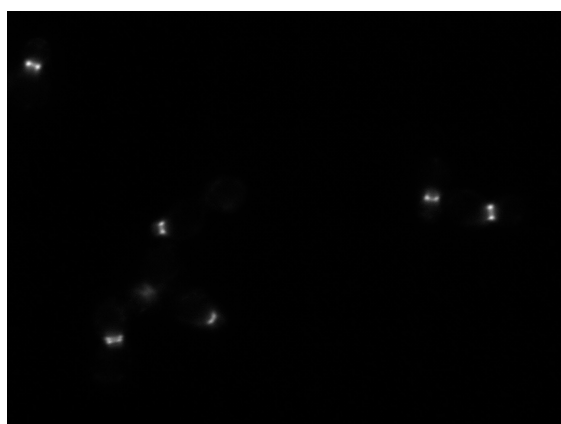

*mkc1-/-*

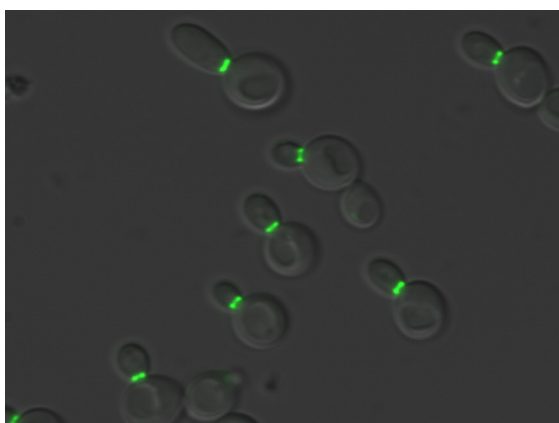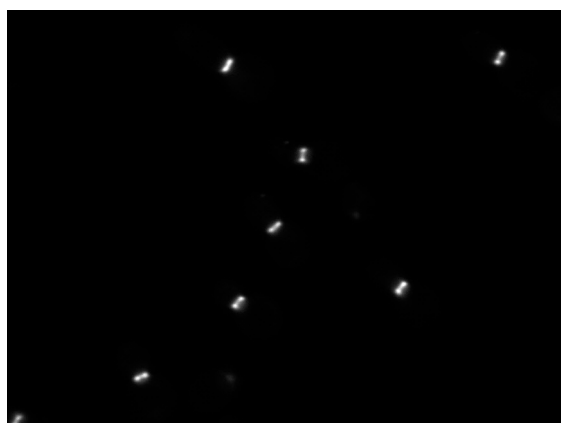

*mkk2-/-*

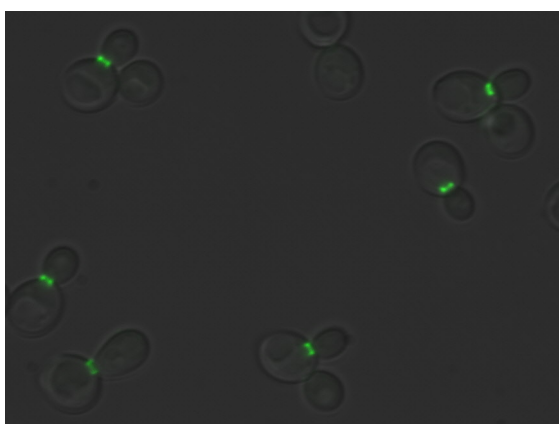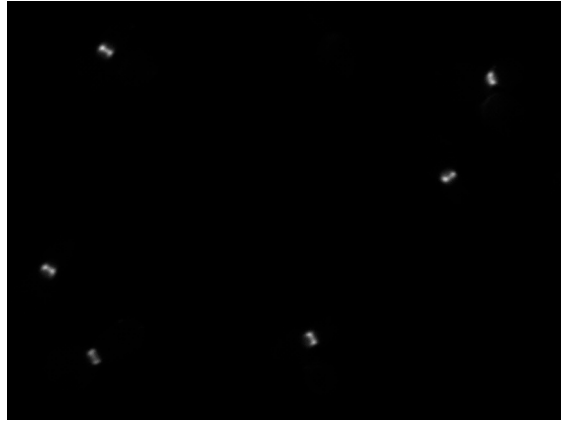

DIC/SEP7-GFP merge

SEP7-GFP

*mss2-/-*

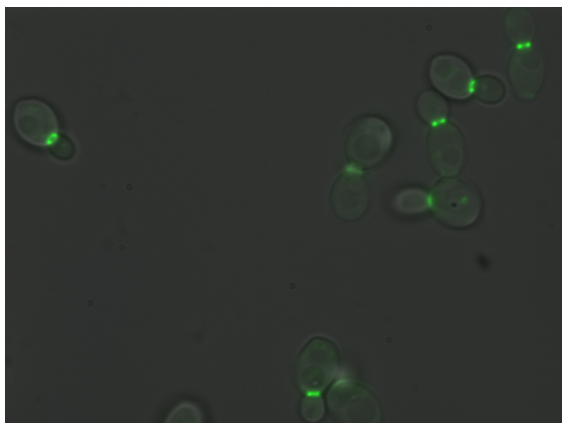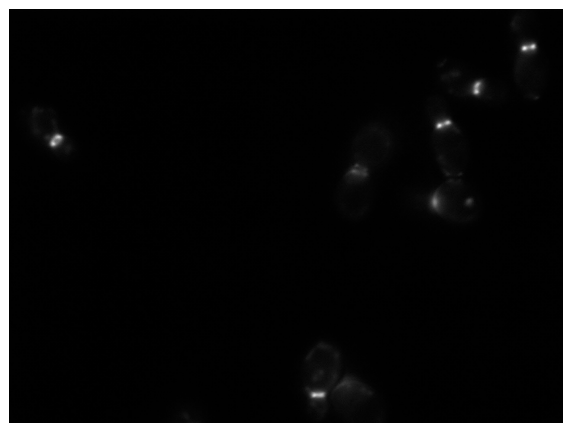

*pkc1-/-*

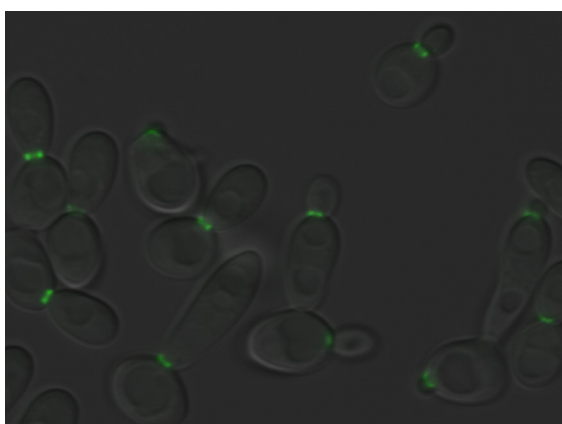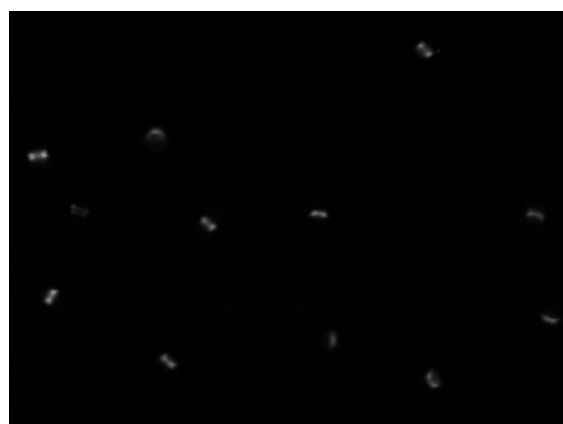

*prk1-/-*

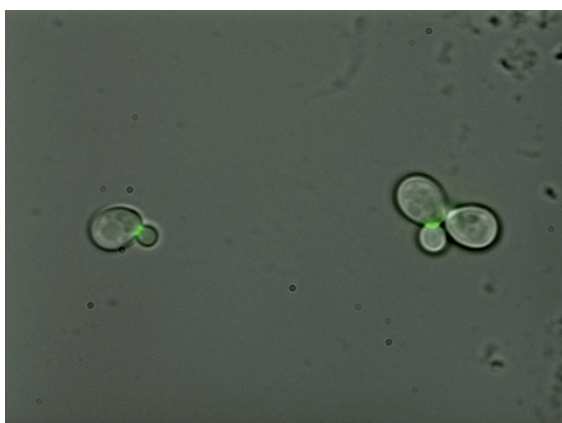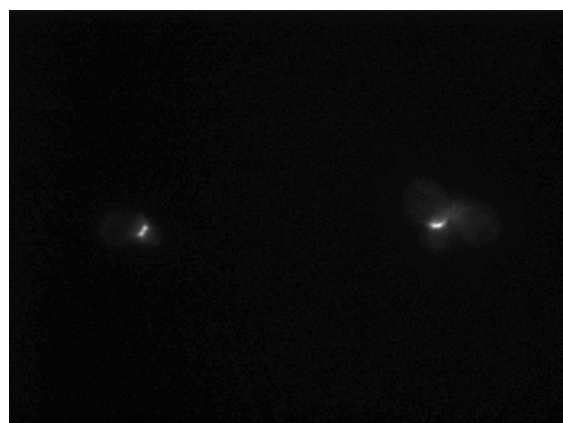

*rio2-/-*

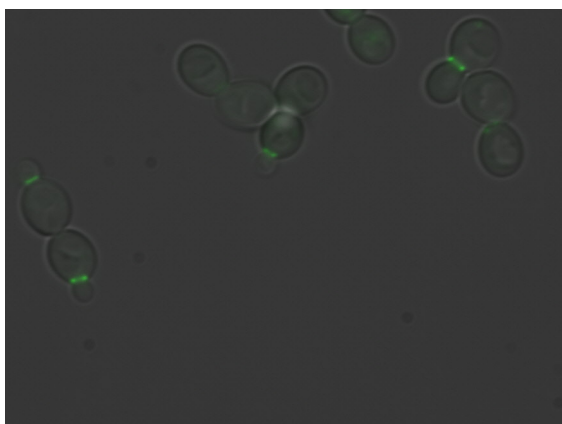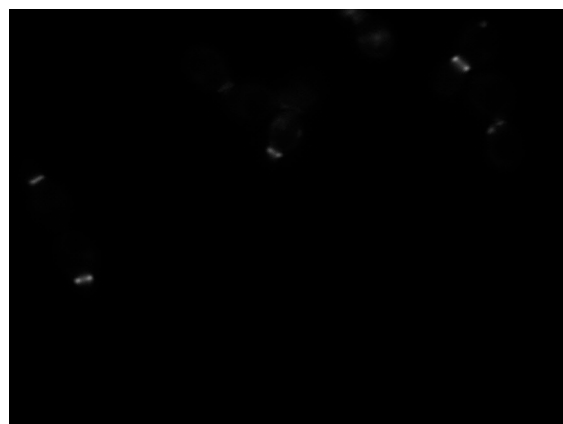

DIC/SEP7-GFP merge

SEP7-GFP

*sip3*<sup>-/-</sup>

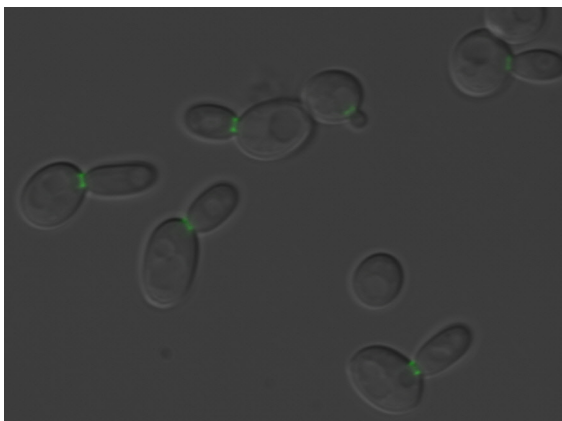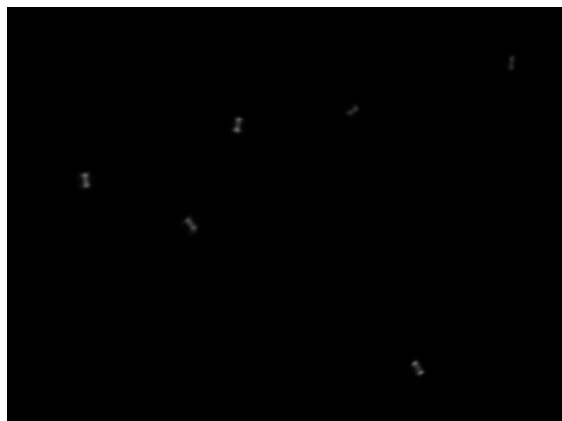

*swe1*<sup>-/-</sup>

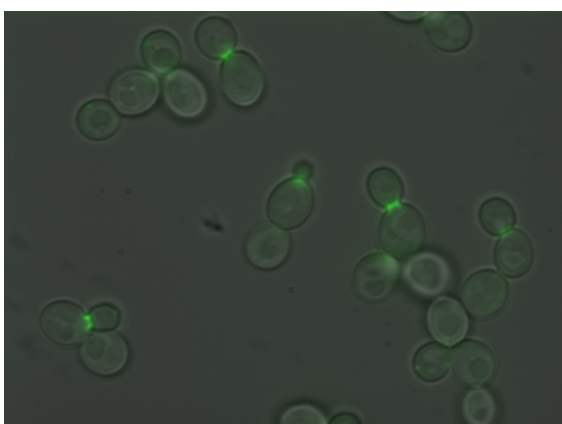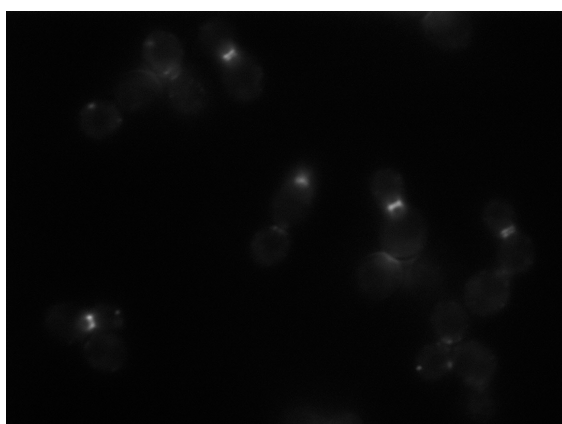

*tpk1*<sup>-/-</sup>

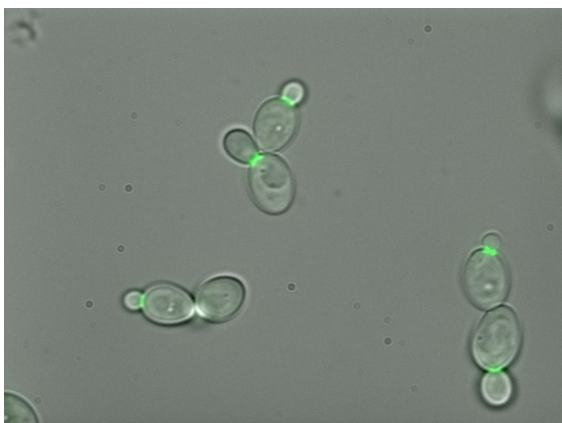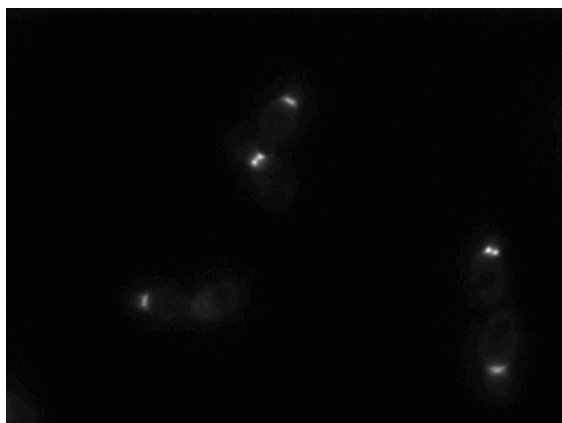

*vps34*<sup>-/-</sup>

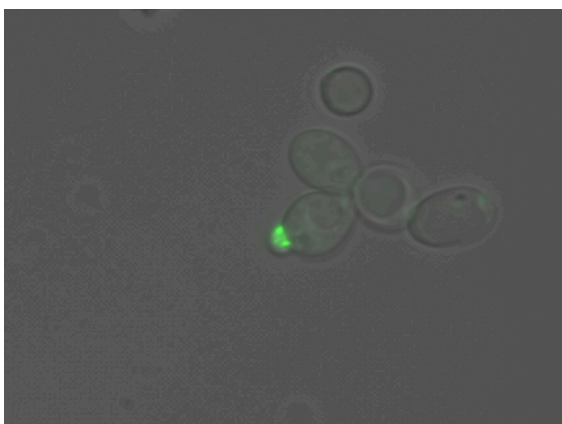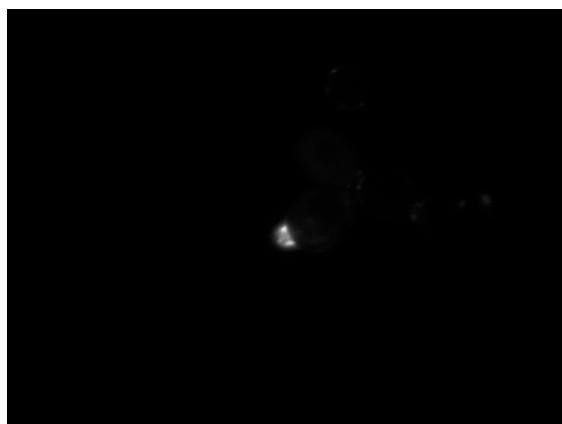

DIC/*SEP7-GFP* merge

*SEP7-GFP*

*yck2*<sup>-/-</sup>

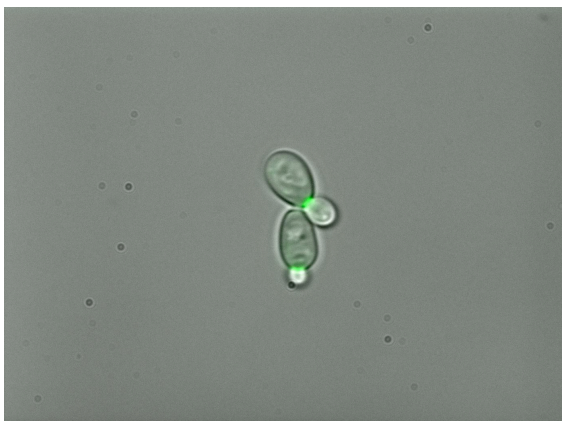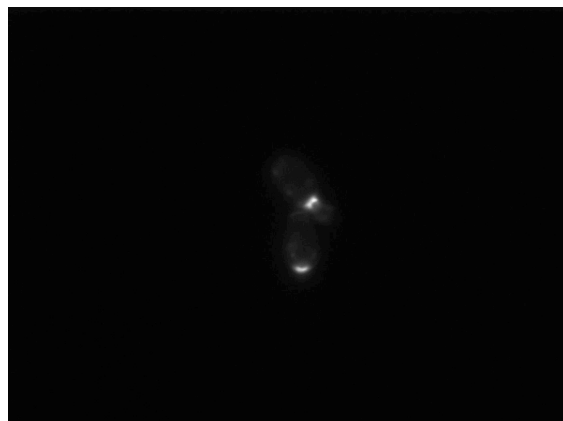

*yck3*<sup>-/-</sup>

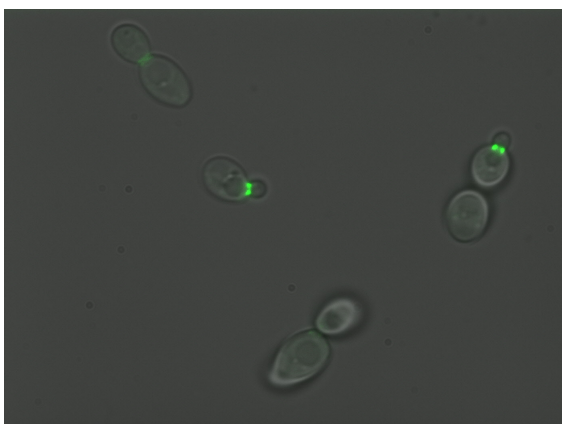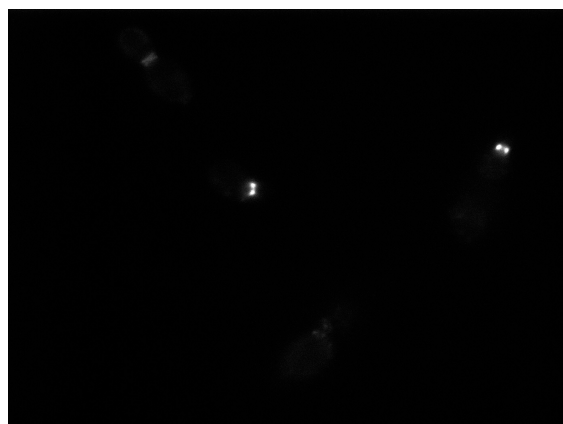

Supplement: ppat.1000752.s003.pdf [file ppat.1000752.s003.pdf]
