# Supplementary material for: An Extensive Circuitry for Cell Wall Regulation in Candida albicans
Source: PubMed Central journal article supplement (PMC2816693; doi:10.1371/journal.ppat.1000752), 2010-02-05

Figure S2

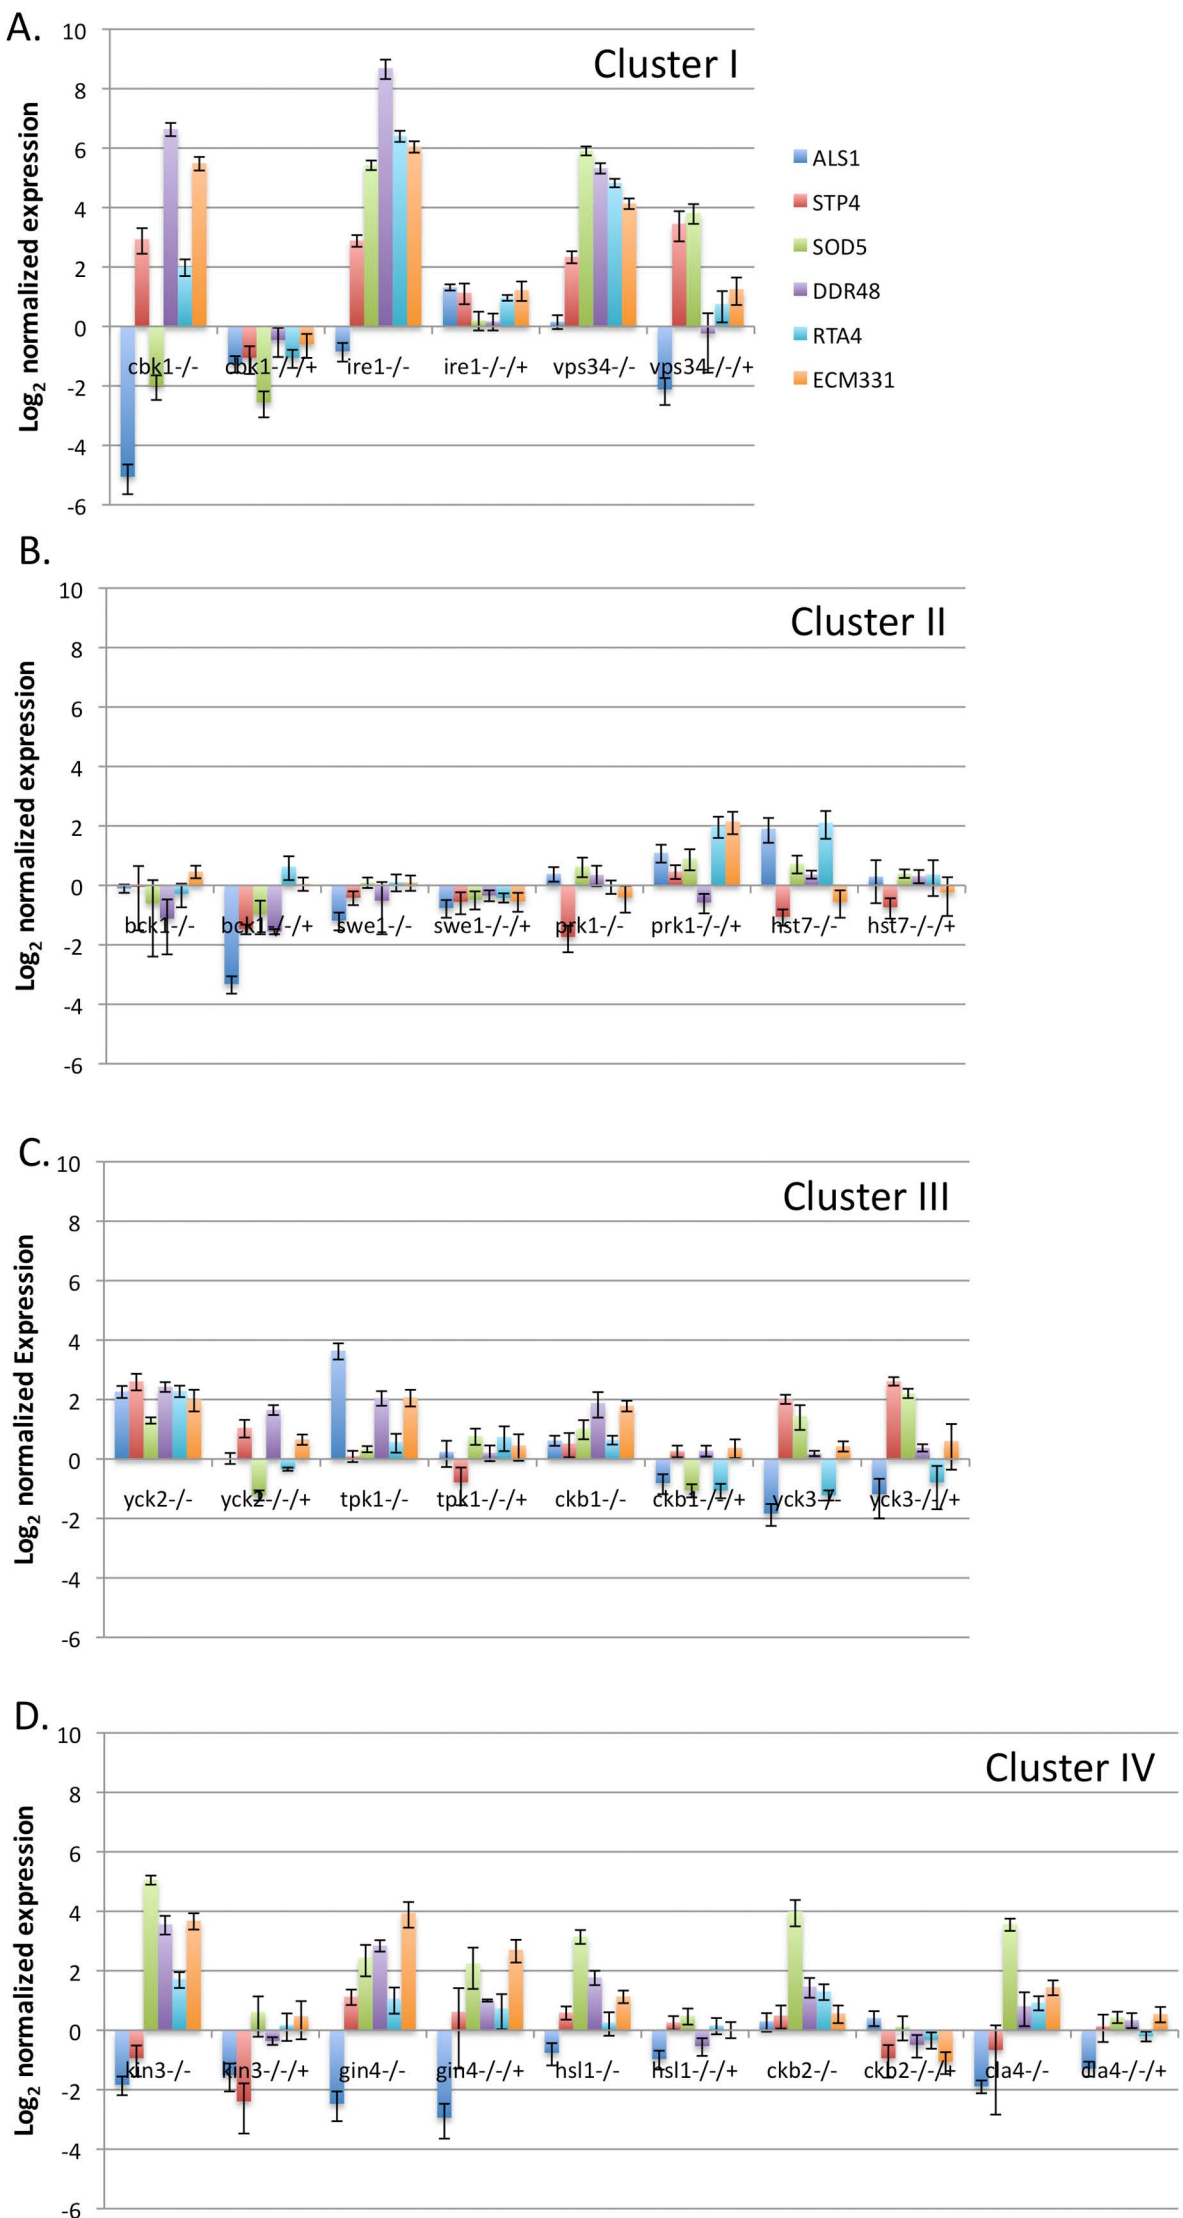

Supplement: ppat.1000752.s002.pdf [file ppat.1000752.s002.pdf]
